# Supplementary material
Source: PubMed Central journal article supplement (PMC3072059)
Supplement: NIHMS43631-supplement-Supp_Fig_Legend.pdf [file NIHMS43631-supplement-Supp_Fig_Legend.pdf]

## Figure Legends

Supplementary Figure 1. Nestin knockdown in rodent AT6.3 and human PC3 prostate carcinoma cells does not affect cell growth.

(A) Colorimetric viability assay showing equivalent anchorage-dependent cell growth between AT6.3-Control /AT6.3-siNestin and PC3-Control /PC3-siNestin cells, respectively. All time points were performed at least in triplicate. (B) Culture plates and (C) quantitation (average number of colonies per well in triplicate) of soft agar colony formation assay showing equivalent anchorage-independent growth in AT6.3-Control and AT6.3-siNestin cells. All error bars in this figure represent mean values + or +/- SD, respectively.
