# Supplementary material
Source: PubMed Central journal article supplement (PMC3072059)
Supplement: NIHMS43631-supplement-Tables.pdf [file NIHMS43631-supplement-Tables.pdf]

**Supplementary Table 1.** Pathologic features of the surgically resected tumor specimens used in this study.

**Localized tumors (ADT-naïve)**

| <i>Gleason Score</i> | <i>Pathological Stage</i> |     |     | <b>Total</b> |
|----------------------|---------------------------|-----|-----|--------------|
|                      | T2                        | T3A | T3B |              |
| 5-6                  | 15                        | 4   | -   | 19           |
| 7                    | 10                        | 4   | 1   | 15           |
| 8                    | 24                        | 28  | 5   | 57           |
| 9-10                 | 7                         | 17  | 9   | 33           |
| <b>Total</b>         | 56                        | 53  | 15  | 124          |

**Localized tumors (ADT-treated)**

| <i>Gleason Score</i> | <i>Pathological Stage</i> |     |     | <b>Total</b> |
|----------------------|---------------------------|-----|-----|--------------|
|                      | T2                        | T3A | T3B |              |
| N/A                  | 18                        | 14  | 3   | 35           |
| 5-6                  | 4                         | -   | -   | 4            |
| 7                    | 7                         | 2   | -   | 9            |
| 8-10                 | 1                         | 2   | 1   | 4            |
| <b>Total</b>         | 30                        | 18  | 4   | 52           |

**Metastases (ADT-naïve)**

| <i>Gleason Score</i> | <i>Pathological Stage</i> |     |     | <b>Total</b> |
|----------------------|---------------------------|-----|-----|--------------|
|                      | T2                        | T3A | T3B |              |
| 5-6                  | -                         | 1   | -   | 1            |
| 7                    | 2                         | 7   | 13  | 22           |
| 8-9                  | -                         | 6   | 17  | 23           |
| <b>Total</b>         | 2                         | 14  | 30  | 46           |

**Supplementary Table 2.** Clinicopathologic features of lethal metastatic cases.

| <i>Case</i> | <i>Survival from<br/>Diagnosis</i> | <i>Gleason<br/>Grade*</i> | <i>TNM Stage*</i> | <i>Therapy</i> | <i>ProstateCa<br/>available at<br/>autopsy</i> | <i>Pre-androgen<br/>ablation tumor<br/>tissue available</i> | <i>Metastatic sites</i>    | <i>Nestin<br/>expression<br/>at autopsy</i> |
|-------------|------------------------------------|---------------------------|-------------------|----------------|------------------------------------------------|-------------------------------------------------------------|----------------------------|---------------------------------------------|
| A1          | 6 yrs                              | 3+4=7                     | T3NxM0            | Ox, Flu        | NO                                             | NO                                                          | Dura, Bone, SV             | NO                                          |
| A2          | 3 yrs, 11 mo                       | 3+4=7                     | T3N1M1            | Flu            | NO                                             | NO                                                          | Liver, Spleen, Adrenal, ST | NO                                          |
| A3          | 13 yrs, 4 mo                       | 3+3=6                     | T2N1M0            | Ox             | NO                                             | NO                                                          | Dura, Bone, Bladder, LN    | YES                                         |
| A4          | 3 yrs, 11 mo                       | 3+3=6                     | T3aN1M0           | Ox, Flu        | NO                                             | NO                                                          | Liver, Bone, LN, rLN       | YES                                         |
| A5          | 1 yr                               | 3+5=8                     | T3NxM1            | Leu            | YES                                            | NO                                                          | Bone, ST, rLN              | NO                                          |
| A7          | 4 yrs, 2 mo                        | 4+3=7                     | T3NxM1            | Leu, Flu       | YES                                            | NO                                                          | Liver, LN                  | YES                                         |
| A9          | 4 yrs, 10 mo                       | 3+4=7                     | T2N1M0            | Leu, Flu       | NO                                             | NO                                                          | Lung, LN, rLN              | YES                                         |
| A10         | 3 yrs, 2 mo                        | 4+4=8                     | TxNxM1            | Gos, Flu       | YES                                            | NO                                                          | LN, rLN                    | NO                                          |
| A11         | 12 yrs, 5 mo                       | NA                        | T2N0Mx            | Leu            | NO                                             | YES                                                         | Bladder, LN, rLN           | NO                                          |
| A12         | 3 yrs, 3 mo                        | 3+5=8                     | T3bN1Mx           | Ox, Flu        | NO                                             | YES                                                         | LN, rLN                    | YES                                         |
| A13         | 1 yrs, 1 mo                        | 5+4=9                     | T2NxM0            | Leu, Flu       | NO                                             | NO                                                          | Bone, LN                   | YES                                         |
| A14         | 7 yrs, 2 mo                        | 5+5=10                    | TxN1M0            | Ox, Flu        | NO                                             | NO                                                          | Liver, Adrenal, LN         | YES                                         |
| A15         | 8 yrs, 4 mo                        | 4+3=7                     | NA                | Leu, Flu       | NO                                             | NO                                                          | Liver, Bone, Adrenal, LN   | YES                                         |
| A16         | 3 yrs, 6 mo                        | 3+4=7                     | NA                | Leu, Flu       | NO                                             | NO                                                          | Dura, LN                   | YES                                         |
| A17         | 3 yrs, 7 mo                        | 5+4=9                     | T3bN1Mx           | Leu, Flu       | NO                                             | YES                                                         | Dura, Bone, LN             | YES                                         |
| A18         | 2 yrs, 1 mo                        | 5+4=9                     | TxNxM1            | Leu, Flu       | YES                                            | NO                                                          | LN                         | NO                                          |
| A19         | 6 yrs, 9 mo                        | NA                        | T3NxMx            | Leu, Flu       | NO                                             | NO                                                          | Dura, LN                   | YES                                         |
| A20         | 1 yr, 9 mo                         | 5+3=8                     | NA                | Ox             | YES                                            | NO                                                          | SV                         | YES                                         |
| A21         | 4 yrs, 5 mo                        | 4+3=7                     | T3aN0Mx           | Leu, Flu       | NO                                             | NO                                                          | Liver, Bone                | YES                                         |
| A22         | 1 yr, 7 mo                         | 5+5=9                     | TxNxM1            | Leu, Flu       | YES                                            | NO                                                          | Adrenal, SV, LN, rLN       | YES                                         |
| A23         | 4 yrs, 7 mo                        | 4+3=7                     | NA                | Gos            | NO                                             | NO                                                          | Liver, Adrenal, ST         | YES                                         |
| A24         | 9 yrs, 8 mo                        | NA                        | NA                | Leu, Flu       | NO                                             | NO                                                          | LN, ST                     | YES                                         |
| A25         | 5 yrs, 5 mo                        | 3+4=7                     | NA                | Ox, Flu        | YES                                            | NO                                                          | Bone, SV                   | NO                                          |
| A26         | 2 yrs, 4 mo                        | 4+4=8                     | TxNxM1            | Gos, Flu       | YES                                            | NO                                                          | Bone                       | YES                                         |
| A27         | 5 yrs, 1 mo                        | 4+3=7                     | TxNxM1            | Leu, Flu       | NO                                             | NO                                                          | Bone, SV, LN               | NO                                          |
| A28         | 14 yrs, 7 mo                       | 3+4=7                     | T3bN0Mx           | Leu, Ox, Flu   | NO                                             | YES                                                         | Bladder, Lung, LN          | YES                                         |
| A29         | 14 yrs, 9 mo                       | 3+3=6                     | T2N0M0            | Gos, Flu       | YES                                            | NO                                                          | Brain, LN                  | YES                                         |
| A30         | 7 yrs, 9 mo                        | 5+4=9                     | T3bN0Mx           | Leu, Flu       | NO                                             | YES                                                         | Liver, Bone, Adrenal, LN   | YES                                         |
| A31         | 7 yrs, 10 mo                       | 3+3=6                     | TxN1M0            | Gos, Flu       | YES                                            | NO                                                          | Dura, Adrenal, LN          | YES                                         |
| A32         | 8 yrs, 7 mo                        | 4+4=8                     | NA                | Ox             | YES                                            | NO                                                          | Bone, LN                   | YES                                         |
| A33         | 8 yrs, 9 mo                        | 4+3=7                     | T2N0M0            | Ox, Flu        | NO                                             | NO                                                          | Dura, Adrenal, LN          | YES                                         |

\* at the time of initial diagnosis; NA, Not Available; Ox, Orchiectomy; Leu, Leuprolide; Flu, Flutamide; SV, Seminal vesicle; LN, Distant lymph nodes; rLN, regional lymph nodes;
