# Supplementary material
Source: PubMed Central journal article supplement (PMC3072059)

# Kleeberger Supplementary Figure 1

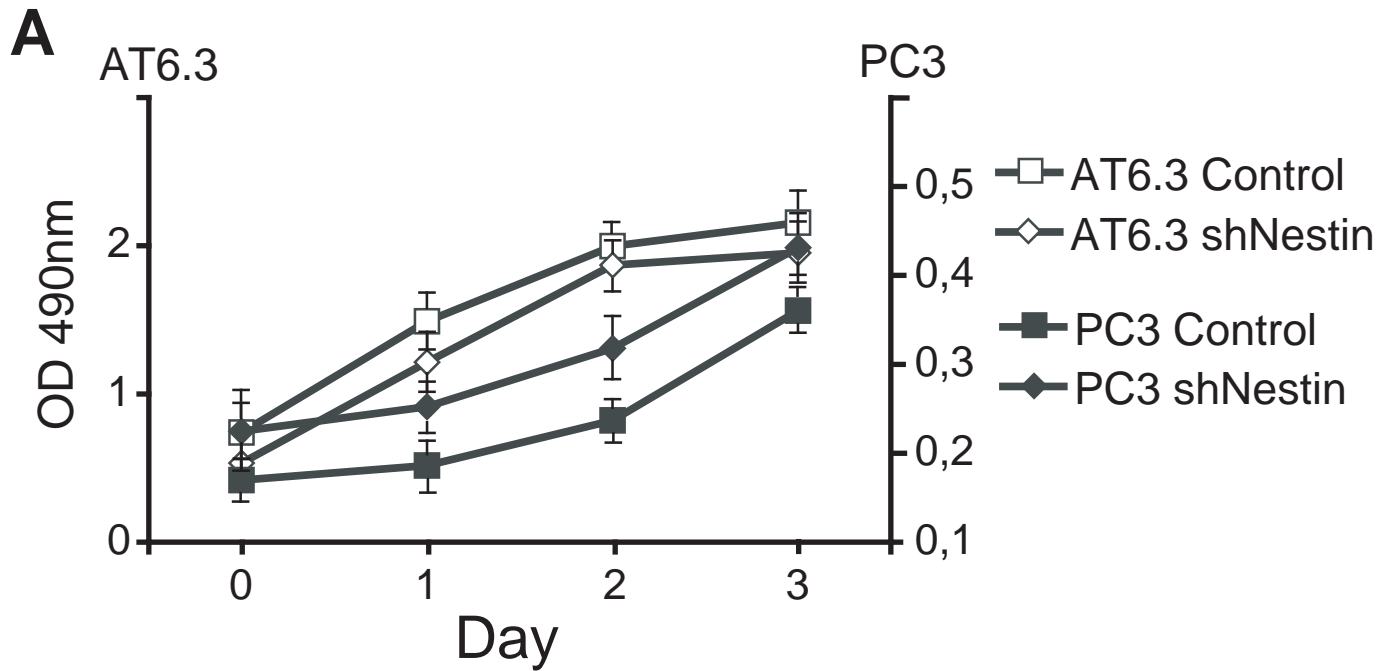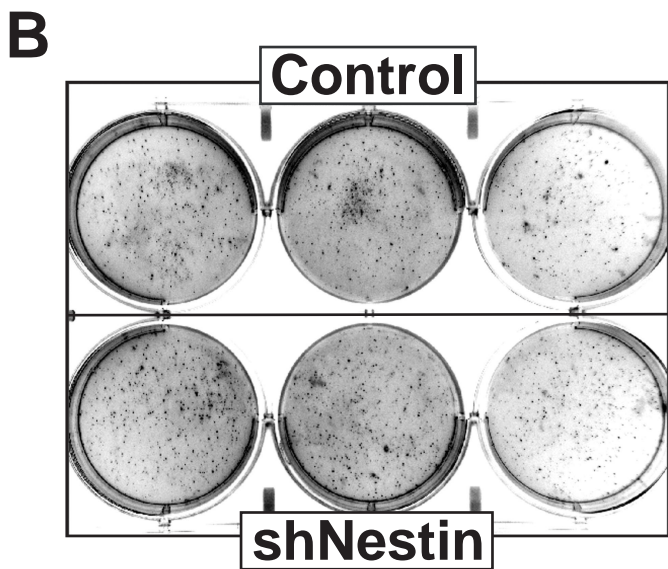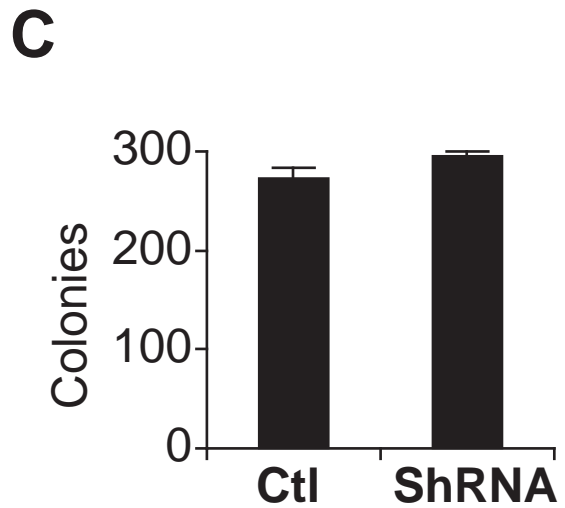

Supplement: NIHMS43631-supplement-Figure.pdf [file NIHMS43631-supplement-Figure.pdf]
